1 **Based on breast CEUS parameters combined with**  
2 **serum CA153, a nomogram model was constructed to**  
3 **predict the molecular classification of breastcancer**  
4

5 Yanlei Ji<sup>1</sup>, Zhen Han<sup>2</sup>, Yong Zhang<sup>3</sup>, Wenwen Sun<sup>1\*</sup>,

6  
7 <sup>1</sup>Department of Ultrasound Medicine, Shandong Cancer Hospital and Institute,  
8 Shandong First Medical University and Shandong Academy of Medical Sciences, Jinan,  
9 Shandong Province 250117, China

10 <sup>2</sup>Department of Internal Medicine, Jinan Second People's Hospital, Jinan, China. Jinan,  
11 Shandong Province 250022, China

12 <sup>3</sup>Department of Radiation Oncology , Shandong Cancer Hospital and Institute,  
13 Shandong First Medical University and Shandong Academy of Medical Sciences, Jinan,  
14 Shandong Province 250117, China

15

16 \*Corresponding author: Wenwen Sun

17 telephone number : 18206413312

18 E-mail: [sunwenwen419@163.com](mailto:sunwenwen419@163.com)

19 Current Address: Shandong Cancer Hospital and Institute, Shandong First Medical  
20 University and Shandong Academy of Medical Sciences, 440 Jiyan Road, Jinan,  
21 Shandong

22

23

24

25

26

27

28

## 29 **Abstract**

30 Objective: To analyze the role of contrast-enhanced ultrasound (CEUS)  
31 parameters combined with serum tumor marker CA153 in the prediction of Breast  
32 Cancer (BC) molecular typing. Methods: From January 2020 to January 2023, 120  
33 BC patients diagnosed in our hospital were studied. According to the pathological  
34 results, the patients were divided into Luminal and non-Luminal BC groups. Both  
35 groups underwent contrast-enhanced ultrasound. The time-intensity curve (TIC) is  
36 obtained, and the relevant characteristic parameters are obtained, including peak  
37 intensity (PI), peak time (TTP), area under the curve (AUC), and mean transit time  
38 (MTT). Serum tumor marker CA153 was detected in both groups. Combined with  
39 CEUS characteristic parameters and serum CA153 of two groups of BC patients, a  
40 multiple Logistic regression model was constructed, and a nomogram prediction model  
41 was constructed based on the model. Calibration curve and receiver operating  
42 characteristic (ROC) curve were used to analyze the value of this model in the  
43 prediction of BC molecular classification. Results: There were no significant  
44 differences between Luminal BC patients and non-Luminal BC patients in clinical  
45 parameters and qualitative parameters of contrast-enhanced ultrasound, while there  
46 were statistical differences between quantitative parameters PI, AUC and serum tumor  
47 marker CA153. The AUC of the combined diagnosis of three parameters (PI, AUC and  
48 CA153) was significantly higher than that of the single index diagnosis group. The  
49 ROC curve AUC of BC molecular typing was predicted to be 0.94 based on the three-  
50 parameter nomogram, and the fitting of the actual curve and the ideal curve in the

51 calibration curve was close. Conclusions: The nomogram model based on breast  
52 contrast-enhanced ultrasound (CEUS) parameters combined with serum CA153 can  
53 effectively predict the molecular classification of BC.

54 **Keyword:** Breast Cancer, CEUS, ROC, CA153

55

## 56 **Introduction**

57 Breast Cancer (BC) is one of the most common malignant tumors in wom  
58 en. In recent years, its incidence has been increasing year by year and showing  
59 a trend of youth, and seriously threatening the life health and quality of life of  
60 patients<sup>[1]</sup>. BC is a hormone-dependent tumor, and its carcinogenic risk is close  
61 ly related to estrogen imbalance<sup>[2-4]</sup>. Estrogen is mediated by estrogen receptor  
62 (ER) and progesterone receptor (PR) and its expression level is different in dif  
63 ferent BC patients, and its clinical manifestations, treatment and prognosis are  
64 also different<sup>[5, 6]</sup>. Based on the expression status of ER and PR, BC is divided  
65 into Luminal type (positive for either ER or PR, including Luminal A and Lu  
66 minal B) and non-Luminal type (negative for both ER and PR, including HER  
67 -2 and TN)<sup>[7]</sup>. Therefore, the development of accurate diagnostic methods for B  
68 C patients with different molecular subtypes is very important for the treatment  
69 and prognosis of patients<sup>[8]</sup>. In recent years, with the development of molecular  
70 biology technology, more tumor molecular markers related to BC have been di  
71 scovered. Evaluating the expression levels of these markers in the serum of pat  
72 ients can provide valuable information for the occurrence, invasion and metasta

73 sis of BC<sup>[9]</sup>. Studies have suggested that carbohydrate antigen 153 (CA1563), c  
74 arcinoembryonic antigen (CEA) and carbohydrate antigen 125 (CA125) have ce  
75 rtain clinical value for BC screening, postoperative follow-up, recurrence and m  
76 etastasis, especially CA153, which is the most valuable single diagnostic index  
77 with the best sensitivity, accuracy, positive predictive value and specificity<sup>[10]</sup>.  
78 However, CA153 alone cannot accurately reflect the overall situation of the les  
79 ion. contrast-enhanced ultrasound (CEUS), as a non-invasive imaging technique,  
80 can observe the microcirculation in BC lesions. At the same time, it can fully  
81 reflect the information of the internal and peripheral tissue structure of the lesi  
82 on<sup>[11]</sup>. Based on this, the present study constructed a nomogram diagram with  
83 CEUS parameters combined with serum tumor marker index CA153 to predict  
84 different BC molecular typing, with a view to providing clinical reference for  
85 precise diagnosis and personalized treatment of BC.

86

## 87 **Materials and methods**

### 88 **1.1 Patients**

89 01/09/2024 searched the HIS information of our hospital, and selected 120 breast cancer  
90 patients diagnosed by examination from January 2020 ~ January 2023 as the research  
91 subjects. All patients underwent ultrasonography and clinical immunohistochemical  
92 pathology. Inclusion criteria: Invasive BC was confirmed by needle biopsy and  
93 immunohistochemical evaluation was performed; No chronic diabetes mellitus;

94 Patients volunteered to participate in the study; Complete medical records. Exclusion  
95 criteria: serious cardiovascular and cerebrovascular diseases and digestive tract  
96 diseases; Hypertension and autoimmune disease; Pregnancy or breastfeeding;  
97 Allergic to ultrasound contrast agent. This study was approved by the Ethics Committee  
98 of our hospital, and all patients have signed informed consent.

## 99 **1.2 Contrast-enhanced ultrasound**

100 GE Logiq E9 color Doppler ultrasonic diagnostic instrument, ML6-15 probe, frequency  
101 9~15 MHz; Equipped with contrast-enhanced ultrasound imaging software. First,  
102 routine ultrasound was performed to observe the conditions of both mammary glands  
103 and determine the location of breast lesions to obtain better two-dimensional images.  
104 The optimal section was selected to cut into the angiography state, and 2.4 ml Sonovi  
105 (Bracco, Italy) was injected rapidly through the cubitus vein, and then rinsed with 5.0  
106 ml 0.9% normal saline. The dynamic perfusion process of breast lesions was observed  
107 and recorded. The region of interest (diameter 4 mm, area 8 mm<sup>2</sup>) was selected when  
108 the breast lesions reached the peak of enhancement, and 5 points were selected from  
109 the inside and the edge of the lesions as the region of interest. The measured values of  
110 the region of interest at a total of 10 points were recorded and their mean values were  
111 taken. Start the QLAB analysis software to automatically analyze and obtain the time-  
112 intensity curve (TIC), and perform curve fitting to obtain the blood flow parameters of  
113 the region of interest: peak intensity (PI), peak time (TTP), area under the curve (AUC)  
114 and mean transit time (MTT). The above images were analyzed by two physicians. If

115 there were any differences in the diagnosis results, the third physician would participate  
116 in the discussion and get the final result after reaching an agreement.

### 117 **1.3 Immunohistochemical examination**

118 The expression levels of ER, PR, HER-2 and Ki-67 were detected in all BC samples  
119 after paraffin embedding and SP staining. ER, PR Rubric<sup>[12]</sup>: ER and PR positive tumor  
120 nuclei  $\geq 1\%$  positive,  $< 1\%$  negative. HER-2 Rubric<sup>[13]</sup>: Negative 1+ is HER-2 negative  
121 and 3+ is HER-2 positive; those with 2+ need to be tested by fluorescence in situ  
122 hybridization, in which those with gene amplification are HER-2 positive and those  
123 without amplification are HER-2 negative. Ki-67 proliferation index<sup>[12]</sup>: Select the  
124 area with the highest staining density of tumor cells, and count the staining of 1000  
125 cells. The number of positive cells/total cell count is the Ki-67 proliferation index.

### 126 **1.4 CA153 detection and judgment criteria**

127 2 mL of fasting venous blood was collected from both groups of patients in the early  
128 morning, and then centrifuged at 3000 r/min for 10 min after self-coagulation to  
129 separate the serum, which was stored in the refrigerator at  $-20^{\circ}\text{C}$  for examination. Serum  
130 CA153 concentration was detected by using Abbott Architecti 2000 automatic  
131 chemiluminescence immunoassay analyzer and special reagents. All operations were  
132 performed in strict accordance with the instrument and reagent instructions. The critical  
133 value of CA153 was 31.3 U/mL, and the assay was considered positive if the value  
134 exceeded the critical value.

### 135 **1.5 Data analysis**

136 All analyses were performed using R software version 4.0.2. Logistic regression and  
 137 ROC analysis using R software. Measurement information data were expressed as  
 138 Mean±SD and one-way ANOVA was used for comparison between groups. Count data  
 139 data were expressed as frequencies and  $\chi^2$  test was used. Receiver operating  
 140 characteristic curves (ROC) were used to analyze the diagnostic performance of the  
 141 model for different BC subtypes.  $P<0.05$  was statistically significant.

142

## 143 Results

### 144 2.1 Clinical characteristics

145 The 120 study patients ranged in age from 24 to 80 years. There were 72  
 146 patients with Luminal BC and 48 patients with non-Luminal BC. The general  
 147 data of the study patients included age, maximum mass diameter, menopause,  
 148 pathological type, and pathological grade, and the results were shown in Table  
 149 1. There was no significant difference in the general data of 120 patients with  
 150 different BC types.

151

152 **Table 1 Clinical characteristics**

| Molecular type | Age (years, mean±SD) | Maximum diameter (mm, mean±SD) | Menopause |     | Pathological type         |                            | Histological grade |    |     |
|----------------|----------------------|--------------------------------|-----------|-----|---------------------------|----------------------------|--------------------|----|-----|
|                |                      |                                | N         | Yes | invasive ductal carcinoma | invasive lobular carcinoma | I                  | II | III |
|                |                      |                                |           |     |                           |                            |                    |    |     |

|             |            |            |       |    |        |    |       |    |    |
|-------------|------------|------------|-------|----|--------|----|-------|----|----|
| Luminal     | 52.68±10.0 | 22.57±9.56 | 55    | 17 | 48     | 12 | 12    | 45 | 18 |
| Non-Luminal | 52.0±10.15 | 24.30±7.76 | 32    | 16 | 41     | 2  | 5     | 31 | 10 |
| $\chi^2/t$  | 0.3626     | 1.044      | 1.365 |    | 0.1950 |    | 0.059 |    |    |
| <i>P</i>    | 0.7175     | 0.2985     | 0.243 |    | 0.9071 |    | 0.808 |    |    |

153

## 154 **2.2 CEUS manifestations**

155 The results of comparing the qualitative parameters of ultrasonography in patients  
 156 with different BC subtypes are shown in Figure 1 and Table 2. In patients with the  
 157 Luminal type, ultrasonography is dominated by centripetal hyperenhancement, with a  
 158 predominantly rapid ascending and slow descending enhancement pattern, and unclear  
 159 and enlarged enhancement with radiolucent convergence of the borders; Centripetal  
 160 enhancement accounted for 14/39 patients with the non-Luminal type, with a  
 161 predominantly rapid ascending and slow descending pattern of enhancement, unclear  
 162 and enlarged borders after enhancement, and radiolucent convergence of the borders.

163

### 164 **Figure 1 Contrast-enhanced ultrasound of different molecular types of BC**

165 (A: Ultrasonography of a patient with Luminal B BC showing radial convergence around the periphery of the mass  
 166 on ultrasonography; B: Ultrasonography of a patient with TN BC showing a well-defined and well-formed lesion  
 167 on ultrasonography)

168

169

170 **Table 2 Contrast-enhanced ultrasound findings of patients with different BC types**



| Molecular type | Enhanced intensity |      |       | Enhancement sequence |        |             | enhancement mode |                            |                            | Enhanced post-bou ndary |          | Radial conver gence |     | Enhance d range |           | Perfusi on defect |     |
|----------------|--------------------|------|-------|----------------------|--------|-------------|------------------|----------------------------|----------------------------|-------------------------|----------|---------------------|-----|-----------------|-----------|-------------------|-----|
|                | Equ al             | lo w | hi gh | offc ente r          | ent ad | dispe rsion | slow d ecline    | Rapid growth slow d ecline | Rapid growth slow d ecline | cle ar                  | unc lear | Ye s                | N o | Eq ual          | enl arg e | Y es              | N o |
| Lumi nal       | 18                 | 15   | 39    | 17                   | 32     | 23          | 12               | 56                         | 4                          | 14                      | 58       | 49                  | 3   | 19              | 53        | 44                | 28  |
| Non-lumi nal   | 8                  | 1    | 39    | 7                    | 14     | 27          | 8                | 36                         | 4                          | 22                      | 26       | 28                  | 2   | 27              | 21        | 30                | 18  |
| $\chi^2$       | 12.1607            |      |       | 11.9245              |        |             | 4.8137           |                            |                            | 10.4762                 |          | 13.0319             |     | 14.6953         |           | 5.3785            |     |
| <i>P</i>       | 0.058              |      |       | 0.063                |        |             | 0.5679           |                            |                            | 0.0649                  |          | 0.054               |     | 0.062           |           | 0.1460            |     |

171

### 172 **2.3 Comparison of CEUS characteristic parameter and** 173 **CA153**

174 The CEUS quantitative parameters and serum CA153 indexes of patients  
 175 with different BC types were compared, The results are shown in Table 3. Th

176 ere were significant differences in PI, AUC and serum CA153 between Lumina  
177 l and non-Luminal BC patients.

178

179 **Table 3 Comparison of CEUS characteristic parameter and CA153**

| Molecular type | PI(%)     | TP(s)     | AUC(%s)      | MTT(s)    | CA153(U/mL)  |
|----------------|-----------|-----------|--------------|-----------|--------------|
| Luminal        | 37.50±2.2 | 23.18±2.2 | 1576.11±272. | 31.42±4.6 | 111.18±43.86 |
| Non-Luminal    | 44.53±7.1 | 23.55±4.2 | 1907.74±340. | 32.42±5.2 | 84.57±39.30  |
| t              | 6.600     | 0.541     | 5.961        | 1.112     | 3.401        |
| P              | <0.001    | 0.589     | <0.001       | 0.269     | <0.001       |

180

## 181 **2.4 Binary logistic regression analysis screened the** 182 **independent predictors of BC molecular typing**

183 To further evaluate the predictive performance of serum tumor marker CA153 and  
184 contrast-enhanced ultrasound parameters in different types of BC. Univariate  
185 regression analysis was performed to compare the clinical data, CEUS quantitative  
186 parameters and serum tumor marker CA153 between Luminal and non-Luminal  
187 subtypes. Subsequently, univariate factors with P values < 0.05 were included in the  
188 multivariate regression analysis, including CEUS parameters PI, AUC and serum tumor

189 marker CA153. Multivariate logistic regression analysis showed that PI, AUC and  
 190 CA153 were independent predictors of BC molecular typing ( $P < 0.05$ ). (Table 4).

191 **Table 4 Binary logistic regression analysis screened the independent predictors of**  
 192 **BC molecular typing**

| Variate              | Univariate regression analysis |           |       | Multivariate regression analysis |       |   |
|----------------------|--------------------------------|-----------|-------|----------------------------------|-------|---|
|                      | OR                             | 95%CI     | P     | OR                               | 95%CI | P |
| Age                  | 0.99                           | 0.96,1.03 | 0.715 | -                                | -     | - |
| Menopause            | 1.47                           | 0.65,3.33 | 0.355 | -                                | -     | - |
| Maximum diameter     | 1.02                           | 0.98,1.07 | 0.297 | -                                | -     | - |
| Histological grade   | 0.79                           | 0.33,1.90 | 0.597 | -                                | -     | - |
| Enhanced intensity   | 2.25                           | 0.88,5.78 | 0.092 | -                                | -     | - |
| Enhancement sequence | 2.73                           | 0.97,7.71 | 0.058 | -                                | -     | - |
| enhancement mode     | 1.50                           | 0.29,7.81 | 0.630 | -                                | -     | - |

|                        |      |           |         |      |           |       |
|------------------------|------|-----------|---------|------|-----------|-------|
| Enhanced post-boundary | 0.29 | 0.13,0.64 | 0.103   | -    | -         | -     |
| Radial convergence     | 1.52 | 0.71,3.25 | 0.278   | -    | -         | -     |
| Enhanced range         | 0.58 | 0.13,0.60 | 0.215   | -    | -         | -     |
| Perfusion defect       | 0.99 | 0.96,1.03 | 0.087   | -    | -         | -     |
| PI                     | 1.36 | 1.20,1.53 | < 0.001 | 1.31 | 1.09,1.58 | 0.004 |
| TP                     | 1.04 | 0.92,1.16 | 0.542   | -    | -         | -     |
| AUC                    | 1.01 | 1.01,1.01 | < 0.001 | 1.01 | 1.01,1.01 | 0.002 |
| MTT                    | 1.04 | 0.97,1.13 | 0.269   | -    | -         | -     |
| CA153                  | 0.98 | 0.98,0.99 | 0.002   | 0.98 | 0.96,0.99 | 0.001 |

193

194 **2.5 Construction of nomogram prediction model and**  
 195 **comparative analysis of prediction efficiency**

196 Based on the independent predictors (PI, AUC, CA153) of the three molecular  
197 subtypes of BC screened by binary logistic regression analysis, ROC curve was  
198 established to evaluate the accuracy of the combination of the three parameters in  
199 predicting non-Luminal BC (Figure 1). The results showed that the area under the curve  
200 (AUC) of the three-parameter model was 0.8307 (95%CI: 0.7437-0.9177), the  
201 sensitivity and specificity of the prediction were 75% and 94.44%, respectively, and  
202 the cut-off value of the prediction model was 0.3437. This indicates that the three-  
203 parameter combined prediction model of PI, AUC and serum CA153 has good  
204 predictive performance for the diagnosis of non-Luminal events (Table 5). Finally, we  
205 constructed a nomogram to predict the probability of non-Luminal BC based on the PI,  
206 AUC, and CA153 mentioned above ( Figure 2). Each independent variable value  
207 corresponds to a score in the top row, and the scores of the individual independent  
208 variables are summed to obtain the total score, from which the probability is  
209 subsequently calculated. Finally, we used ROC curve and calibration curve to evaluate  
210 the predictive performance of the nomogram (Figure 3,4). The AUC of ROC curve was  
211 0.94 (95%CI: 0.90-0.98). In the calibration curve, the actual curve was very close to  
212 the ideal curve. The nomogram has good predictive value for predicting the risk of non-  
213 Luminal BC.

214

215 **Figure2 ROC curve was predicted by three-parameter combination**

216

217 **Table 5 Comparison of AUC values**

|          | AUC    | 95%CI         |
|----------|--------|---------------|
| PI       | 0.8098 | 0.7163-0.9032 |
| AUC      | 0.7590 | 0.6701-0.8478 |
| CA153    | 0.6780 | 0.5799-0.7760 |
| Combined | 0.8307 | 0.7437-0.9177 |

218

219 **Figure 3 ROC curve of the nomogram model**

220

221 **Figure 4 Calibration curve of nomogram model**

222

## 223 **Discussion**

224 BC is a highly vascular heterogeneous and malignant stromal tumor, and i  
225 ts incidence is increasing year by year, which has become the first disease seri  
226 ously endangering women's health<sup>[14]</sup>. The etiology of the disease is still unclea  
227 r, and genetic factors and estrogen endocrine abnormalities are the main causes  
228 of the disease<sup>[15]</sup>. In 2000, Perou et al<sup>[16]</sup> first proposed that BC has different  
229 molecular subtypes, which can be divided into Luminal type and non-Luminal  
230 type (including HER-2 type and TN type). Studies have found that different m  
231 olecular subtypes of BC have different biological behaviors, chemotherapy sensi  
232 tivity and prognosis. Among them, Luminal BC is the most common molecular  
233 subtype, accounting for about 50%-70% of BC including Luminal A and Lumi  
234 nal B subtypes. Non-Luminal BC includess two different subtypes, HER-2 and  
235 TN subtypes, and this molecular subtype of BC is highly heterogeneous and c  
236 haracterized by high invasiveness. Compared with Luminal BC, it is more diffi

237 cult to diagnose and treat. Therefore, early detection, early diagnosis and early  
238 treatment of different molecular subtypes of BC are of great significance for i  
239 mproving the survival rate and quality of life of patients.

240 The occurrence, development, invasion and metastasis of BC are dependent  
241 on neovascular vessels. The marginal zone of tumor is an area with vigorous  
242 growth of tumor cells. The blood vessels are dense and densely distributed, an  
243 astomosing with each other to form loops, and some blood vessels are dilated  
244 in sinus shape<sup>[17]</sup>. CEUS, as a non-invasive imaging method for preoperative ev  
245 aluation of tumor angiogenesis, can accurately display blood perfusion compared  
246 with conventional ultrasound. The application of contrast-enhanced ultrasound c  
247 an not only clearly observe the course and distribution of microvessels in the t  
248 umor, but also provide quantitative analysis of the tumor, providing imaging re  
249 ference for the preoperative diagnosis and treatment of BC<sup>[18]</sup>. In this study, we  
250 compared the characteristics of contrast-enhanced ultrasound between the two gr  
251 oups of patients. We found that the contrast-enhanced ultrasound of Luminal B  
252 C showed high enhancement, unclear boundary, radial convergence around the  
253 periphery, and expanded range after enhancement, and the enhancement pattern  
254 was mostly rapid increase and slow decrease. This result is the same as that o  
255 f Wang Xiaoyan et al<sup>[19]</sup>, and can be used as a sensitive sign of Luminal BC.  
256 Non-Luminal BC showed high enhancement on contrast-enhanced ultrasound, an  
257 d the boundary was basically unclear after enhancement, and the boundary did  
258 not significantly expand after enhancement, similar to the imaging characteristic

259 s of benign tumors, which was rare in other molecular subtypes, highlighting t  
260 he heterogeneity of this subtype. Whether the quantitative parameters of contras  
261 t-enhanced ultrasound are correlated with the molecular subtypes of BC, many  
262 studies have conflicting conclusions<sup>[20]</sup>. Lin Yun<sup>[21]</sup> believes that there is a cert  
263 ain correlation between the quantitative parameters of contrast-enhanced ultrasou  
264 nd in different molecular types of BC, and Jia Wanru<sup>[22]</sup> believes that there is  
265 no statistically significant difference in the quantitative parameters of contrast-e  
266 nhanced ultrasound between different molecular types of BC. In this study, we  
267 found that there were significant differences in PI and AUC of contrast-enhanc  
268 ed ultrasound in patients with different BC subtypes, which may have guiding  
269 significance for predicting different molecular types of BC.

270 At present, with the rapid development of genomics and molecular biology,  
271 different molecular subtypes of BC can better reflect the biological behavior of  
272 tumors. The detection of serum tumor markers can not only assist in diagnosis,  
273 but also effectively predict the efficacy, outcome and acquired drug resistance.  
274 CA153 is an antigen closely related to human breast malignant tumors. It was  
275 first found in BC epithelial cells as a variant of the epithelial surface glycopro  
276 tein of breast cells. When a cell undergoes cancerous transformation, the activa  
277 tion of glycosyltransferases causes changes in cell surface sugars and enters the  
278 blood with the tumor cells<sup>[23]</sup>. It has obvious tumor specificity for BC and is of  
279 great significance for the early diagnosis of BC. The level of its serum content  
280 can be used as an index for the evaluation of the efficacy of BC<sup>[24, 25]</sup>, it is c



281 urrently clinically recognized as a more specific tumor marker for the diagnosis  
282 of BC. In this study, we found that the serum CA153 level was significantly  
283 higher in Luminal subtype patients than in non-Luminal subtype patients. There  
284 fore, we hypothesized that the serum CA153 difference in different BC subtype  
285 s combined with CEUS related parameters could help us to better predict the  
286 molecular subtype of BC. Based on this, we used multivariate Logistic regressi  
287 on to analyze the clinical data, contrast-enhanced ultrasound characteristic para  
288 meters and serum CA153 of the two groups of patients. The results showed th  
289 at the quantitative parameters of contrast-enhanced ultrasound PI, AUC and ser  
290 um CA153 were independent predictors of BC molecular typing. The ROC cur  
291 ve was used to compare the efficacy of PI, AUC, CA153 single parameters an  
292 d the combination of three parameters in the diagnosis of BC molecular typing,  
293 and the results showed that the AUC of the combination of three parameters  
294 was significantly higher than that of each parameter. Then we constructed a no  
295 mogram prediction model using three parameters, and evaluated the predictive  
296 performance of the model using ROC curve and calibration curve. The results  
297 of ROC curve and calibration curve showed that the nomogram had good pred  
298 ictive value for the risk of non-Luminal BC.

299 In conclusion, the ultrasonographic features of BC can reflect the biologica  
300 l characteristics of different BC molecular typing and are closely associated wit  
301 h the serum tumor marker CA153. In this study, the ultrasonographic paramete  
302 rs of PI, AUC and serum CA153 were used to construct a columnar graphical

303 model to effectively predict the molecular typing of BC, which can provide ce  
304 rtain clinical references for accurate diagnosis and personalized treatment of BC.  
305 However, this study is a single-center retrospective analysis with a limited sam  
306 ple size, which did not explore the specific molecular typing of BC and lacked  
307 external data validation, so it needs to be further improved.

308

## 309 **Author contributions**

310 Yanlei Ji, Zhen Han, and Yong Zhang: study design, data analysis and int  
311 erpretation, and manuscript revision. Wenwen Sun: manuscript drafting. All the  
312 authors of this study read and approved the final manuscript.

313

## 314 **Funding**

315 No funding was granted for this study.

316

## 317 **Competing interests**

318 Authors declare no competing interests.

319

320

321

322

323

324

325

326

327

328

329

330

331

332

333

334

335

336

## 337 **References**

- 338 [1] Zhi B, Yu J Q, Lv S Q. To establish a multi-parameter model to predict early triple-negativ  
339 e breast cancer (TNBC)[J]. Radiologic Practice, 2021,36(8):1021-1025.DOI: 10.13609/j.cnki.1  
340 000-0313.2021.08.014
- 341 [2] Burstein H J. Systemic Therapy for Estrogen Receptor-Positive, HER2-Negative Breast Cance  
342 r[J]. N Engl J Med, 2020,383(26):2557-2570.DOI: 10.1056/NEJMra1307118
- 343 [3] Clusan L, Le Goff P, Flouriot G, et al. A Closer Look at Estrogen Receptor Mutations in Br  
344 east Cancer and Their Implications for Estrogen and Antiestrogen Responses[J]. Int J Mol Sci,  
345 2021,22(2).DOI: 10.3390/ijms22020756
- 346 [4] Valko-Rokytovska M, Ocenas P, Salayova A, et al. Breast Cancer: Targeting of Steroid Hor  
347 mones in Cancerogenesis and Diagnostics[J]. Int J Mol Sci, 2021,22(11).DOI: 10.3390/ijms22  
348 115878
- 349 [5] Farcas A M, Nagarajan S, Cosulich S, et al. Genome-Wide Estrogen Receptor Activity in Br  
350 east Cancer[J]. Endocrinology, 2021,162(2).DOI: 10.1210/endocr/bqaa224
- 351 [6] Derakhshan F, Reis-Filho J S. Pathogenesis of Triple-Negative Breast Cancer[J]. Annu Rev P  
352 athol, 2022,17:181-204.DOI: 10.1146/annurev-pathol-042420-093238
- 353 [7] Rella R, Belli P, Giuliani M, et al. Automated Breast Ultrasonography (ABUS) in the Screen  
354 ing and Diagnostic Setting: Indications and Practical Use[J]. Acad Radiol, 2018,25(11):1457-1  
355 470.DOI: 10.1016/j.acra.2018.02.014
- 356 [8] Subramanian S, Keating N L. Delays in breast cancer diagnosis after a state policy limiting  
357 Medicaid enrollment[J]. Cancer, 2017,123(17):3219-3221.DOI: 10.1002/cncr.30769
- 358 [9] Bidard F C, Hajage D, Bachelot T, et al. Assessment of circulating tumor cells and serum m  
359 arkers for progression-free survival prediction in metastatic breast cancer: a prospective obser  
360 vational study[J]. Breast Cancer Res, 2012,14(1):R29.DOI: 10.1186/bcr3114
- 361 [10] Li X, Xu Y, Zhang L. Serum CA153 as biomarker for cancer and noncancer diseases[J]. Pro  
362 g Mol Biol Transl Sci, 2019,162:265-276.DOI: 10.1016/bs.pmbts.2019.01.005
- 363 [11] Ji C L, Li X L, He Y P, et al. Quantitative parameters of contrast-enhanced ultrasound in br  
364 east invasive ductal carcinoma: The correlation with pathological prognostic factors[J]. Clin H  
365 emorheol Microcirc, 2017,66(4):333-345.DOI: 10.3233/CH-170251
- 366 [12] National Health Commission Of The, S Republic Of China. Breast Cancer Guidelines (2022  
367 edition)[J]. China Licensed Pharmacist, 2022,19(10):1-26
- 368 [13] Liu Y P, Bu H, Yang W T. Chinese breast cancer HER2 detection guidelines update inter  
369 pretatio (2019 edition)[J]. Chinese Journal of Pathology, 2019,48(3):182-185.DOI: 10.3760/c  
370 ma.j.issn.0529-5807.2019.03.004
- 371 [14] Sung H, Ferlay J, Siegel R L, et al. Global Cancer Statistics 2020: GLOBOCAN Estimates o  
372 f Incidence and Mortality Worldwide for 36 Cancers in 185 Countries[J]. CA Cancer J Clin,  
373 2021,71(3):209-249.DOI: 10.3322/caac.21660
- 374 [15] Ferlay J, Colombet M, Soerjomataram I, et al. Estimating the global cancer incidence and mo  
375 rtality in 2018: GLOBOCAN sources and methods[J]. Int J Cancer, 2019,144(8):1941-1953.  
376 DOI: 10.1002/ijc.31937
- 377 [16] Perou C M, Sorlie T, Eisen M B, et al. Molecular portraits of human breast tumours[J]. Natu  
378 re, 2000,406(6797):747-752.DOI: 10.1038/35021093

- 379 [17] Bian X W, Jiang X F, Chen J H, et al. Increased angiogenic capabilities of endothelial cells  
380 from microvessels of malignant human gliomas[J]. *Int Immunopharmacol*, 2006,6(1):90-99.DOI  
381 I: 10.1016/j.intimp.2005.08.004
- 382 [18] Claudon M, Dietrich C F, Choi B I, et al. Guidelines and good clinical practice recommendat  
383 ions for contrast enhanced ultrasound (CEUS) in the liver--update 2012: a WFUMB-EFSUMB  
384 initiative in cooperation with representatives of AFSUMB, AIUM, ASUM, FLAUS and ICUS  
385 [J]. *Ultraschall Med*, 2013,34(1):11-29.DOI: 10.1055/s-0032-1325499
- 386 [19] Wang X Y, Kang L K, Lan C Y et al. Characteristics and diagnosis of breast malignant ma  
387 sses by contrast-enhanced ultrasound[J]. *Chinese Journal of Ultrasonography*, 2012,28(08):705  
388 -708
- 389 [20] He J. The application value of contrast-enhanced ultrasound in the diagnosis of breast tumors  
390 [J]. *Journal of Clinical Ultrasound in Medicine*, 2017,19(7):471-473
- 391 [21] Lin Y. *Journal of Clinical Ultrasound in Medicine*[D]. Guangxi Medical University, 2014.
- 392 [22] Jia W R. Study on contrast-enhanced ultrasound based on different molecular subtypes of bre  
393 ast cancer[D]. Shanghai Jiao Tong University, 2015.
- 394 [23] Wang B T. The application value of serum tumor markers combined with dynamic detection  
395 in the diagnosis and monitoring of breast cancer[D]. Qingdao University, 2021.
- 396 [24] Ghadge M S, Naik P P, Tiwari B P, et al. A Comparative Study of Bone Scan Findings and  
397 Serum Levels of Tumor Marker CA15-3 in Patients with Breast Carcinoma[J]. *Indian J Clin*  
398 *Biochem*, 2012,27(1):97-99.DOI: 10.1007/s12291-011-0168-5
- 399 [25] Wang G, Qin Y, Zhang J, et al. Nipple discharge of CA15-3, CA125, CEA and TSGF as a  
400 new biomarker panel for breast cancer[J]. *Int J Mol Sci*, 2014,15(6):9546-9565.DOI: 10.3390  
401 /ijms15069546
- 402

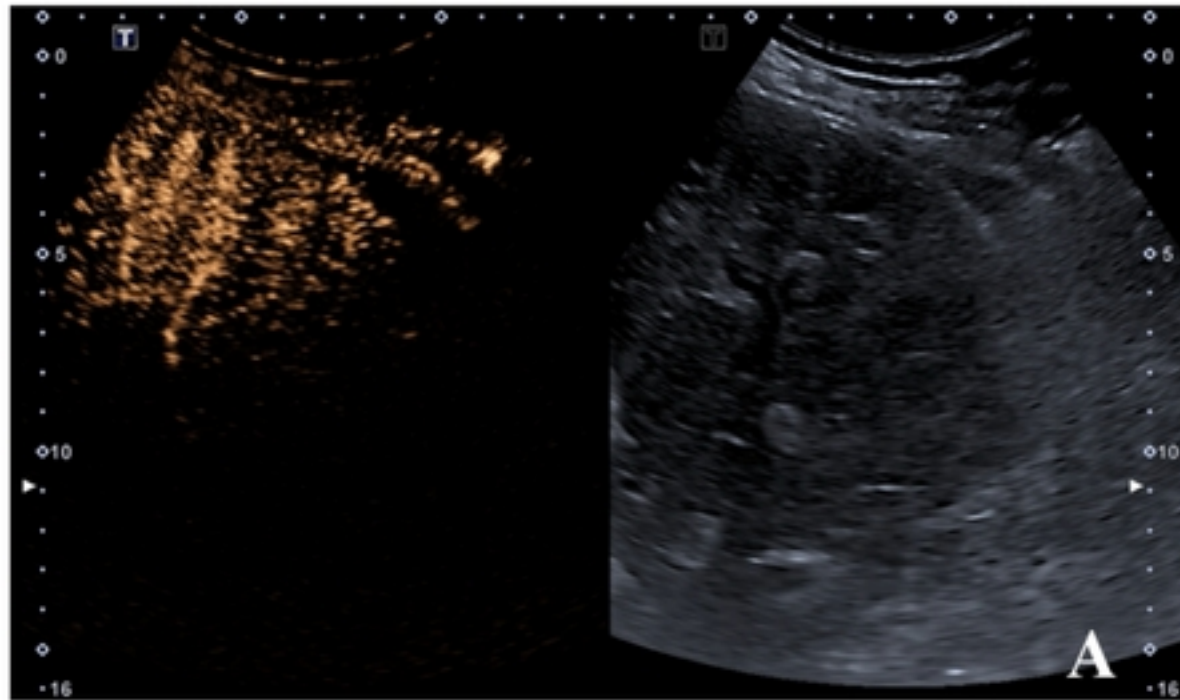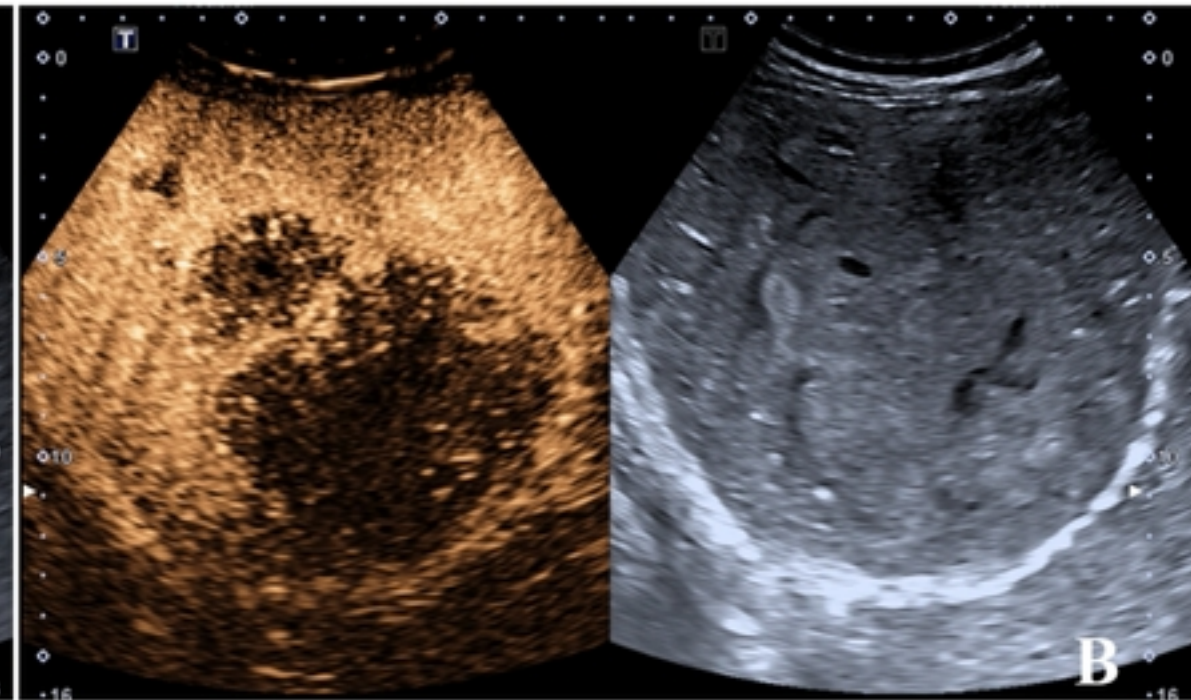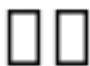



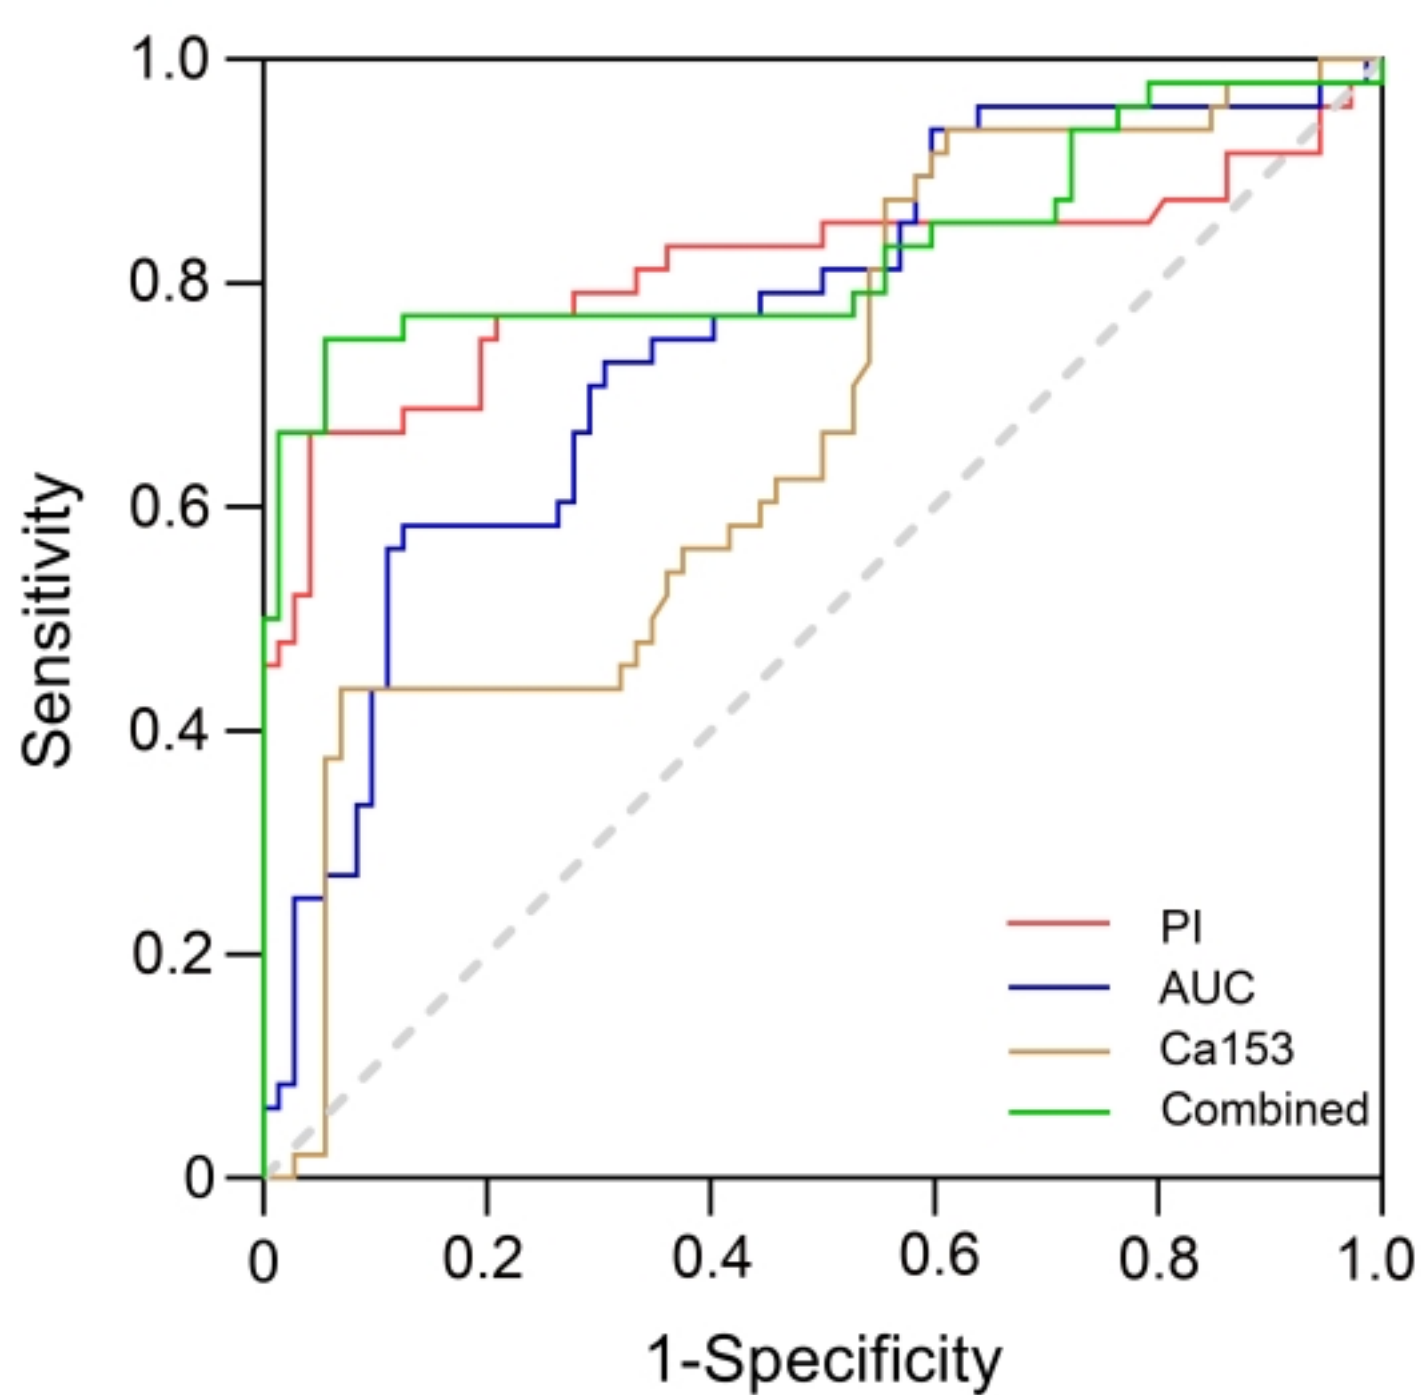



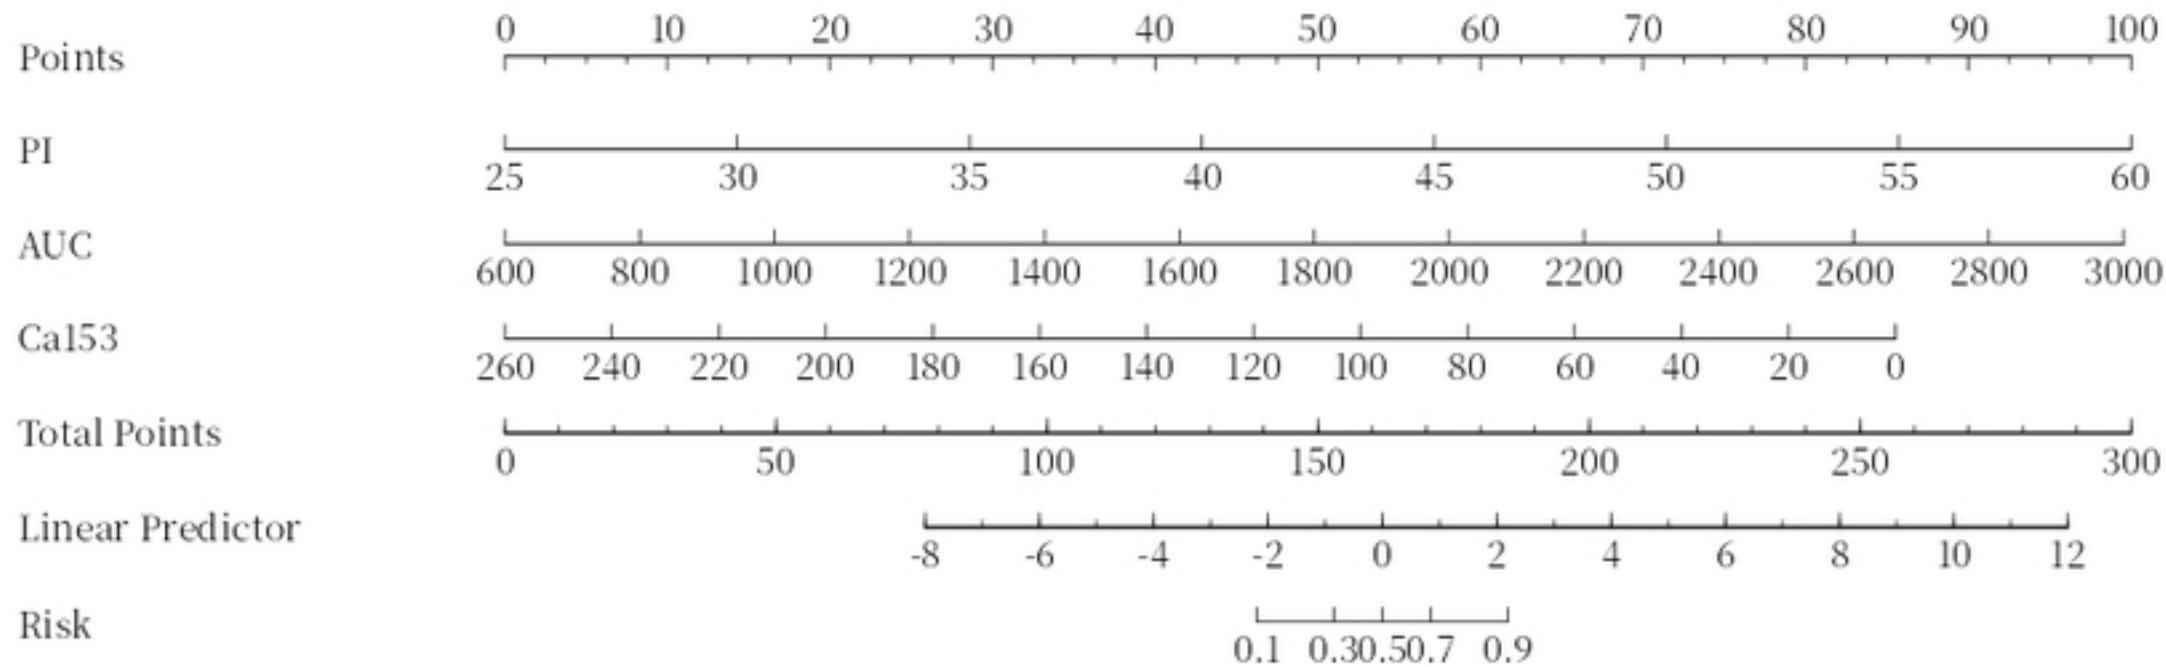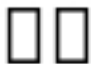

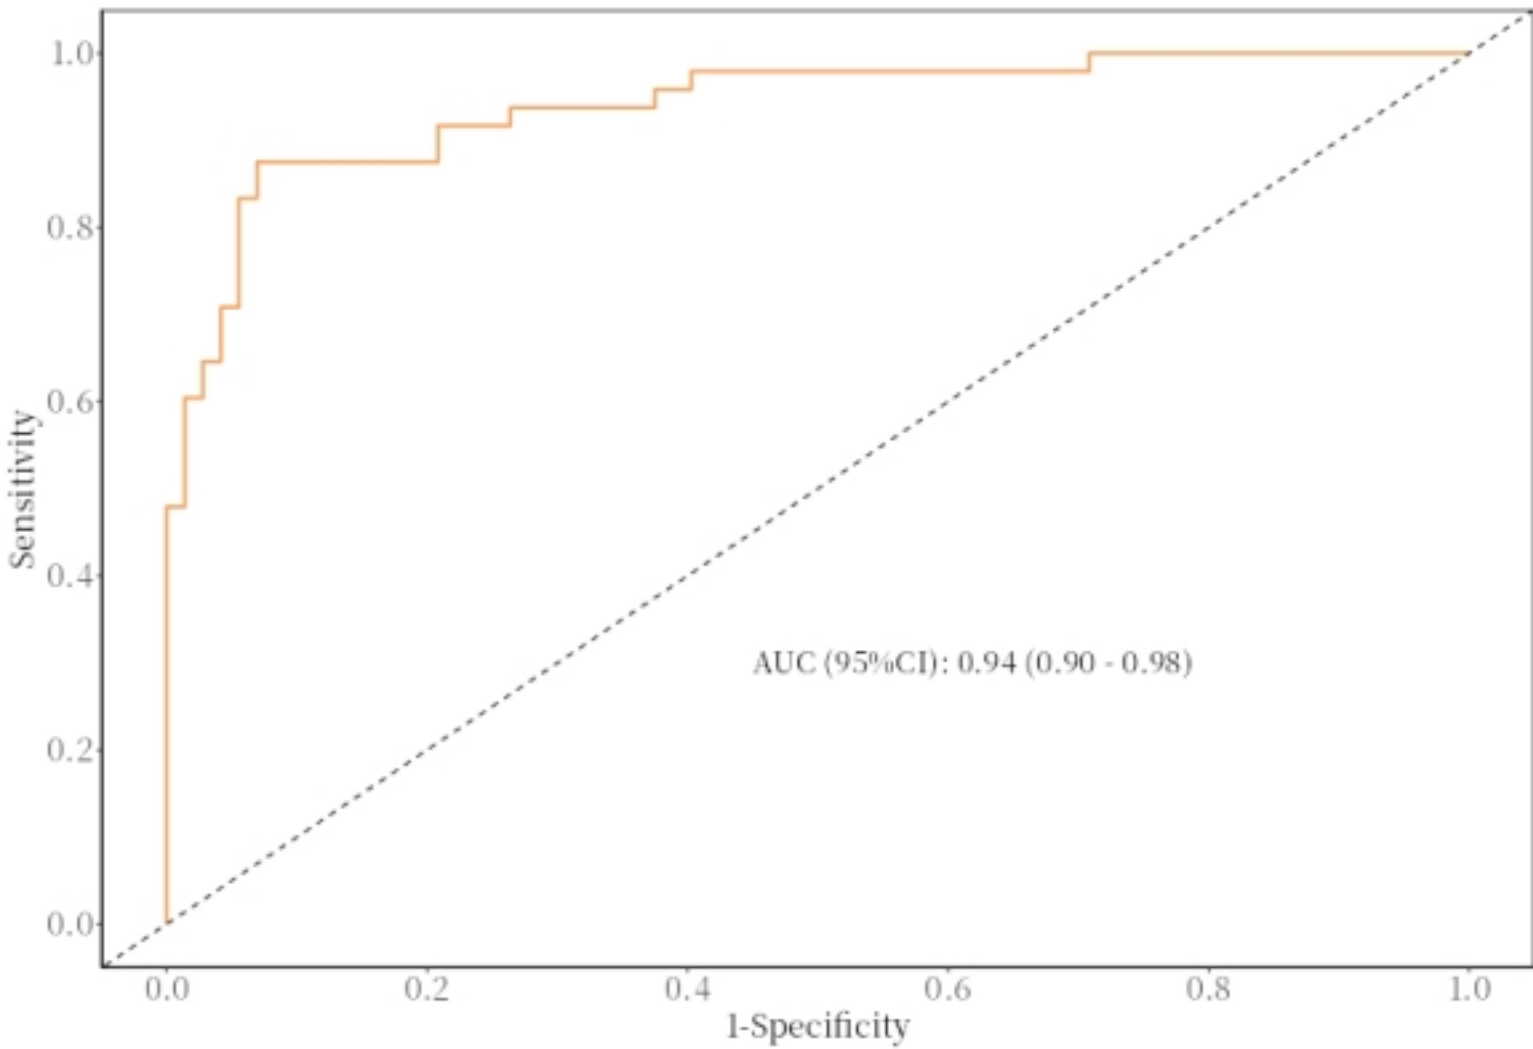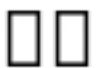

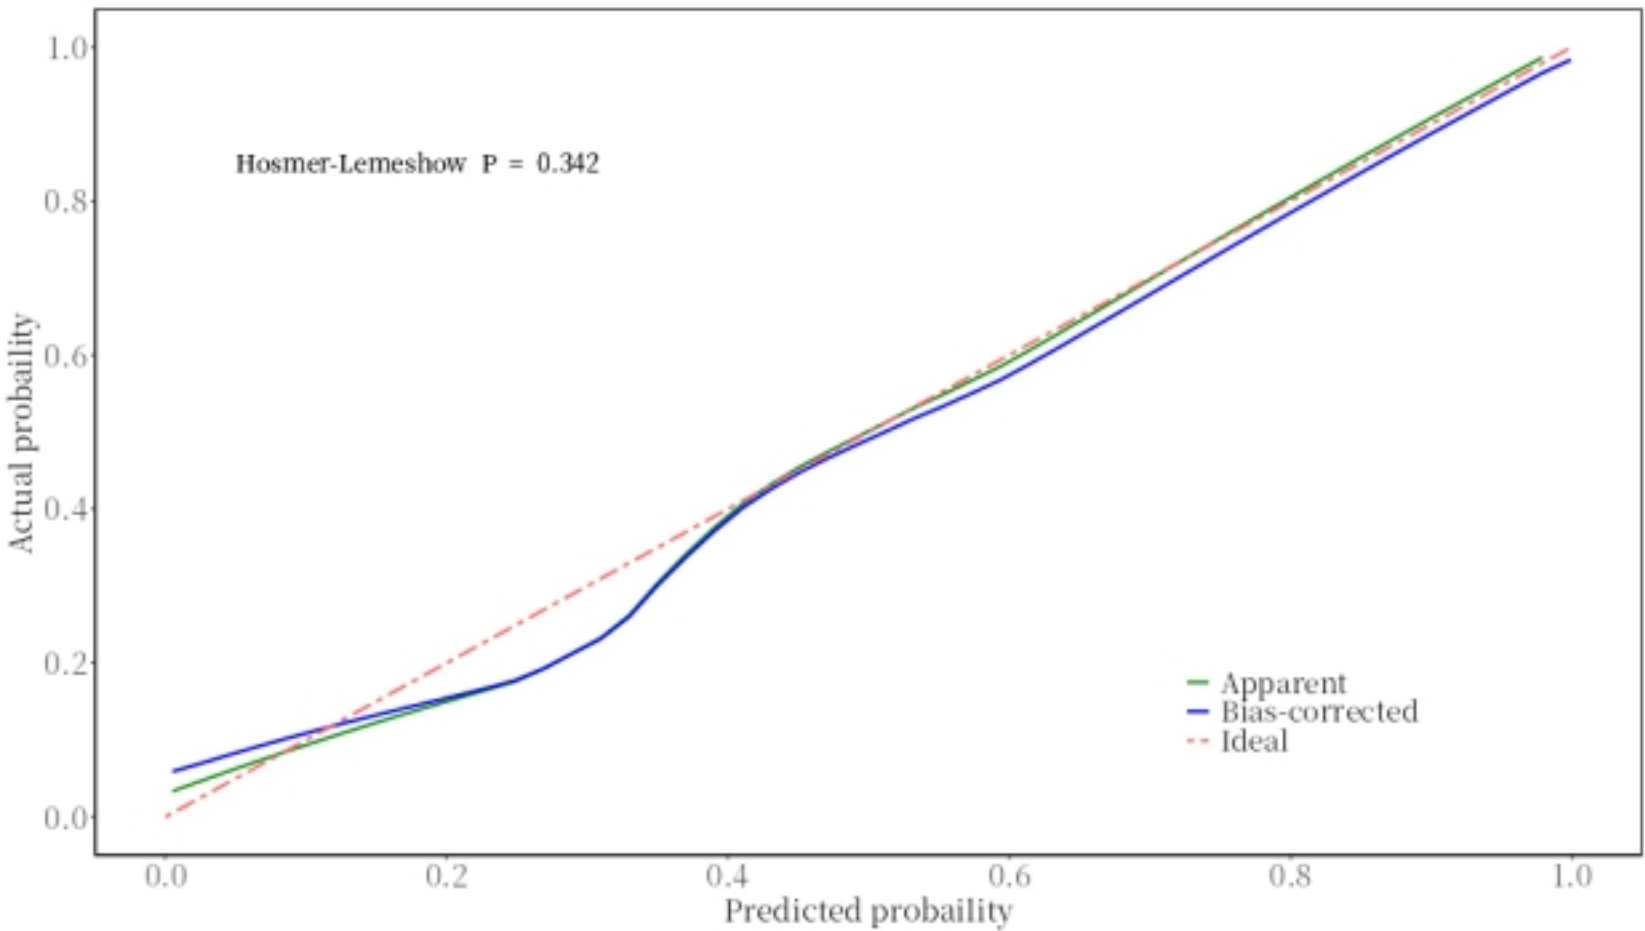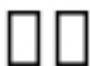

Source: https://medrxiv.org/content/10.1101/2024.10.17.24315659.full.pdf
